# Supplementary material
Source: PubMed Central journal article supplement (PMC4279021)
Supplement: EC.00209-14_zek002154379so1.pdf [file EC.00209-14_zek002154379so1.pdf]

## Supplementary Figures and Tables

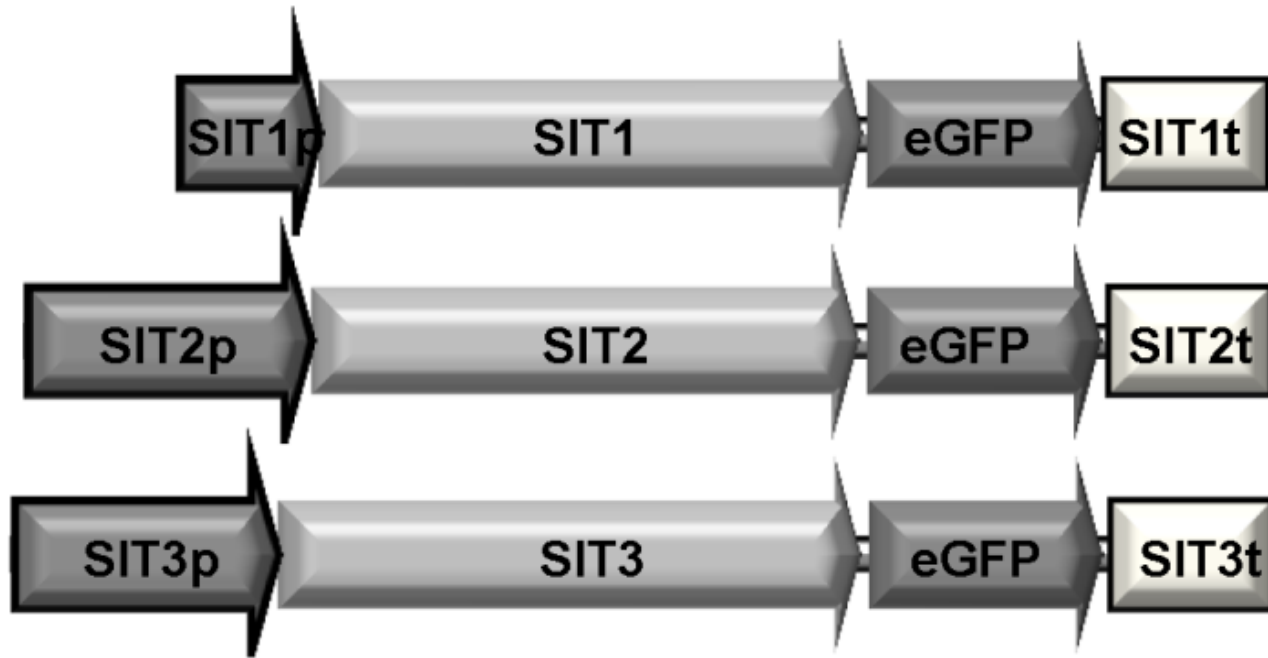

**SI Fig. 1.** Schematic diagrams of the Gateway-system based *T. pseudonana* transformation vectors. A-C, for expression and in vivo localization of eGFP-tagged *SIT* genes under the transcriptional control of respective native promoters. Upper, pMHL\_243; middle, pMHL\_290; lower, pMHL\_293. These vectors were cotransformed with a plasmid vector expressing *Nat1* conferring resistance to the antibiotic nourseothricin.

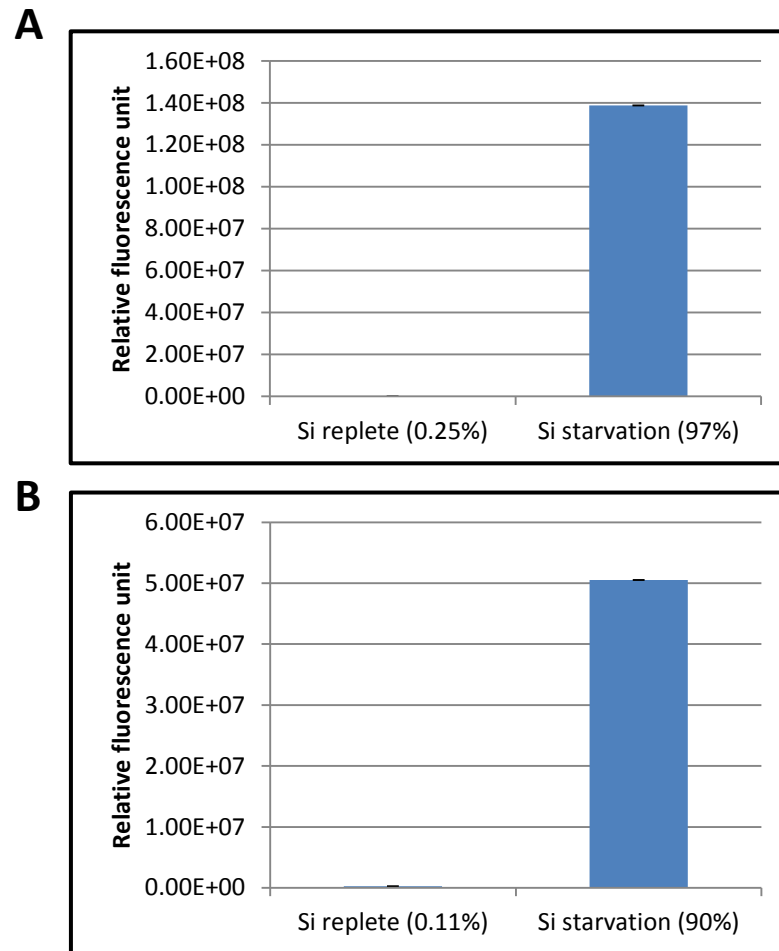

**SI Fig. 2.** Flow cytometry analysis of net eGFP expression . The relative whole cell fluorescence was measured, using a imaging flow cytometer, after incubating *Thalassiosira pseudonana* cells in silicon-replete and silicon-deplete media for 24 hr. *SIT1-eGFP* (A) and *SIT2-eGFP* (B) were transcribed under the transcriptional control of the respective native promoters to analyze expression level in response to Si starvation.

488nm laser with 100 mW power output was used to excite eGFP. Number in parentheses indicate the percentage of fluorescent cells in the gated population .

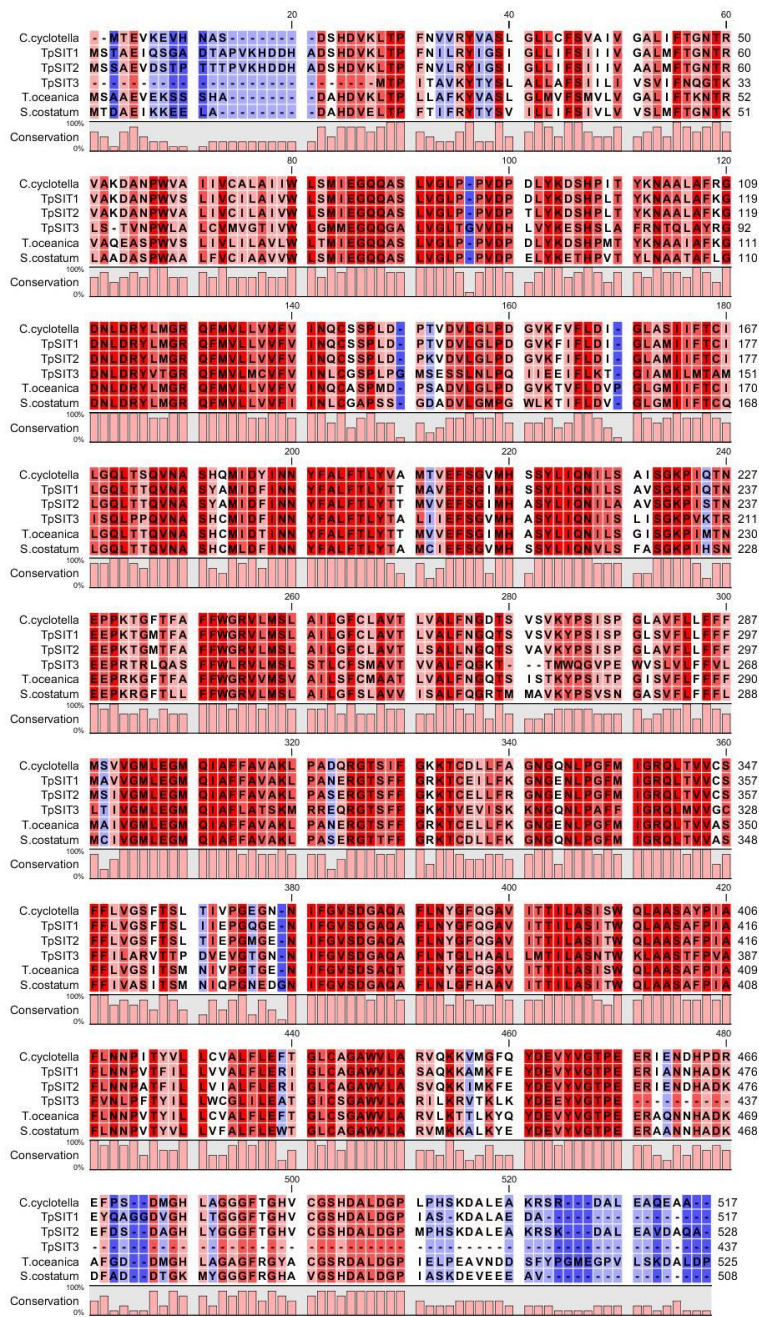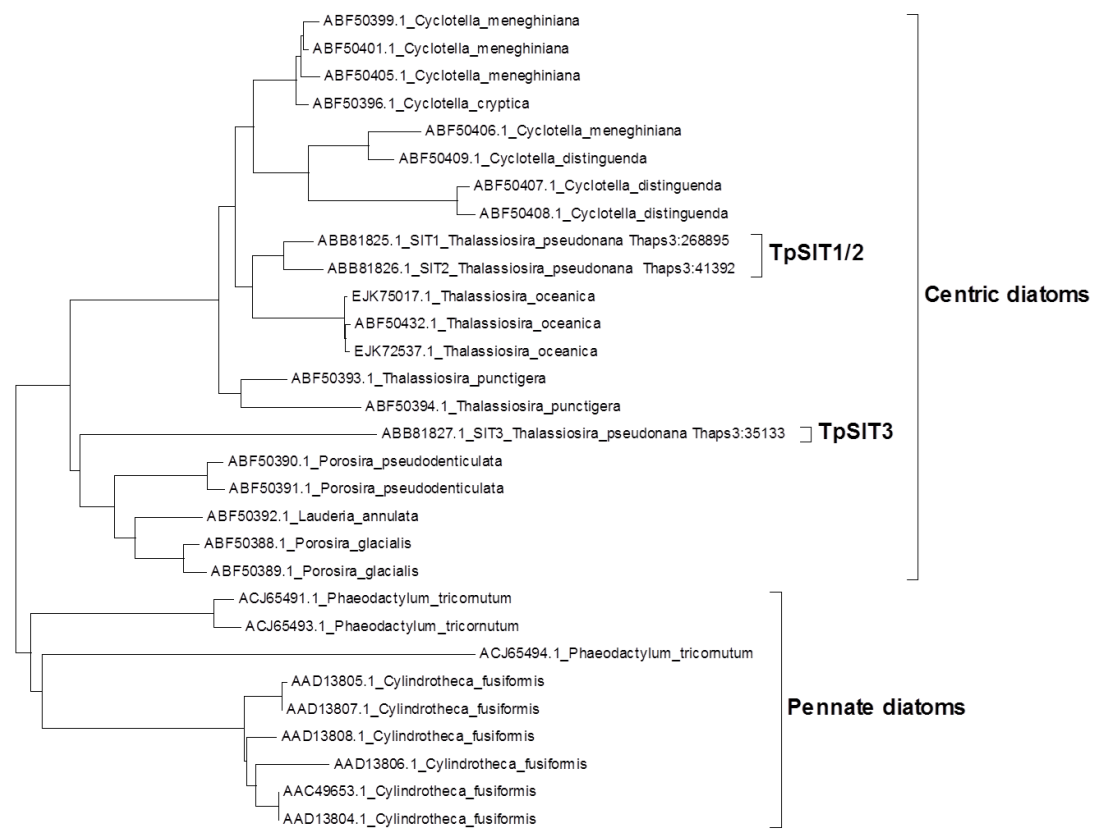

**SI Fig. 3.** Multiple sequence alignments and neighbor joining tree of SITs from centric and pennate diatoms. *T. pseudonana* SIT1 and SIT2 share 92% amino identities, and only 56% to SIT3.

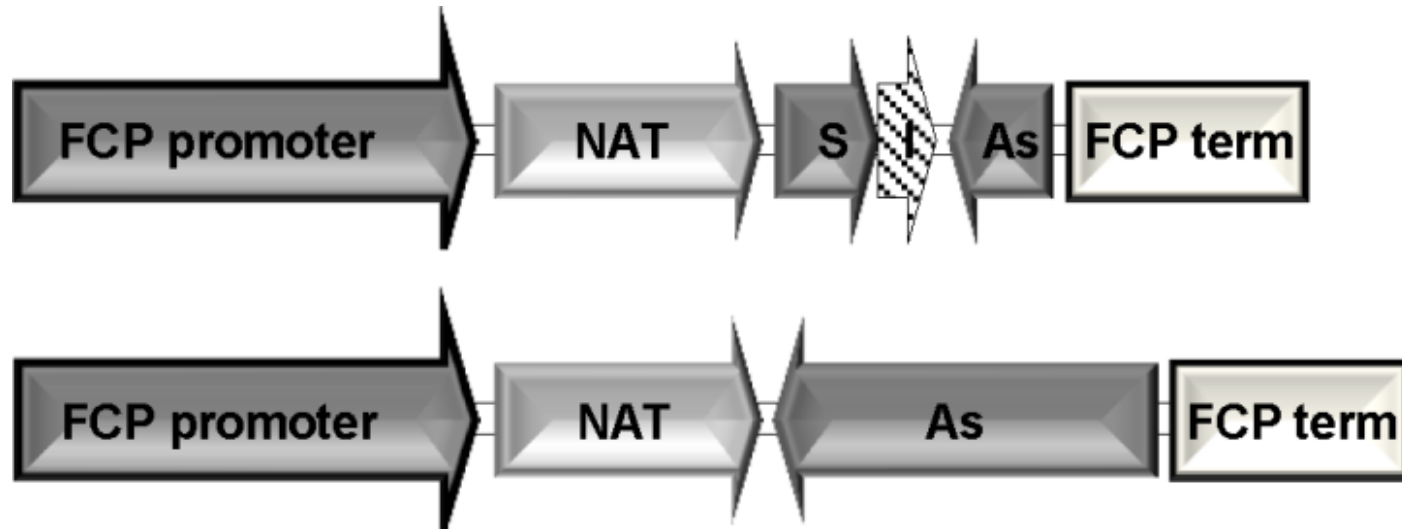

**SI Fig. 4.** Schematic diagrams of the intron-spliced hairpin RNA (RNAi) and antisense RNA expression used for downregulation of silicon transporters in the diatom *T. pseudonana*. For efficient selection of transgenic clones, nourseothricin acetyl transferase gene (NAT) conferring resistance against herbicide nourseothricin was placed at the 3' end of the constitutive promoter FCP (fucoxanthin chlorophyll a/c binding protein).

**SI TABLE 1** Primers used in vector constructions and RT-PCR

| <b>Gateway Vector Construction Primers</b> |                                                           |                      |
|--------------------------------------------|-----------------------------------------------------------|----------------------|
| <b>Primers</b>                             | <b>Sequence</b>                                           | <b>Description</b>   |
| GW-13                                      | GGGGACAACCTTTGTATACAAAAGTTGTACATTCAACGGAATCTGATTATCAAC    | SIT1 as-attB5        |
| GW-14                                      | GGGGACCACTTTGTACAAGAAAGCTGGGTAACCCTTCCATCTCTCCAGGAC       | SIT1 as-attB2        |
| GW-19                                      | GGGGACAACCTTTTCTATACAAAAGTTGTAATGTCTACCGCTGAAATCCAATC     | SIT1 +ve RNAi-attB4r |
| GW-20                                      | GGGGACAACCTTTATTATACAAAAGTTGTCTGTAAGGTCAAAGAGAGCAACG      | SIT1 +ve RNAi-attB3r |
| GW-21                                      | GGGGACAACCTTTGTATAATAAAGTTGTAACAGACGATAAGAGAGACCCATG      | SIT1 -ve RNAi-attB3  |
| GW-22                                      | GGGGACCACTTTGTACAAGAAAGCTGGGTAATGTCTACCGCTGAAATCCAATC     | SIT1 -ve RNAi-attB2  |
| GW-25                                      | GGGGACAAGTTTGTACAAAAAAGCAGGCTTAATGACCACTCTTGACGACACGGC    | NAT-attB1            |
| GW-26                                      | GGGGACAACCTTTTGTATACAAAAGTTGTTTCAGGGGCAGGGCATGCTCATG      | NAT-attB5r           |
| GW-35                                      | GGGGACAAGTTTGTACAAAAAAGCAGGCTTAATGACCACTCTTGACGACACGGC    | NAT-attB1            |
| GW-36                                      | GGGGACAACCTTTGTATAGAAAAGTTGGGTGTCAGGGGCAGGGCATGCTCATG     | NAT-attB4            |
| GW-56                                      | GGGGACAACCTTTTCTATACAAAAGTTGTAATGGTGAGCAAGGGCGAGGAG       | eGFP-F               |
| GW-57                                      | GGGGACAACCTTTATTATACAAAAGTTGTTTACTTGTACAGCTCGTCCATGC      | eGFP-R               |
| GW-104                                     | GGGGACAAGTTTGTACAAAAAAGCAGGCTTAATTACAATTACAGTGTACAGATAATG | SIT1 prom-F          |
| GW-157                                     | GGGGACAACCTTTGTATAGAAAAGTTGGGTGGGCATCCTCGGCAAGAGCATC      | SIT1 gene-R          |
| GW-106                                     | GGGGACAACCTTTGTATAATAAAGTTGTAACCTCTGGCAATCTGTTGTAATAG     | SIT1-term-F          |
| GW-107                                     | GGGGACCACTTTGTACAAGAAAGCTGGGTAAGCAGAAACGAAATCATGCGGAG     | SIT1-term-R          |
| GW-182                                     | GGGGACAAGTTTGTACAAAAAAGCAGGCTTATCACCAGTTTCATAACAACACAACC  | SIT2 prom-F          |
| GW-183                                     | GGGGACAACCTTTGTATAGAAAAGTTGGGTGAGCCTGCGCGTCAACAGCCTC      | SIT2 gene-R          |
| GW-184                                     | GGGGACAACCTTTGTATAATAAAGTTGTAGCAGTGTGTTTGTGTCATCGTG       | SIT2 term F          |
| GW-185                                     | GGGGACCACTTTGTACAAGAAAGCTGGGTAATGATCTCGGGTGGAGGAGTC       | SIT2 term R          |
| GW-186                                     | GGGGACAAGTTTGTACAAAAAAGCAGGCTTAACTTCATCTGACAAACGCCGC      | SIT3 prom-F          |
| GW-187                                     | GGGGACAACCTTTGTATAGAAAAGTTGGGTGCCACTTCGCCAATCCACTTTCA     | SIT3 gene-R          |
| GW-188                                     | GGGGACAACCTTTGTATAATAAAGTTGTAGAAGCGTGATGATAATGCTCTGTC     | SIT3 term-F          |
| GW-189                                     | GGGGACCACTTTGTACAAGAAAGCTGGGTAGTGGCTGTGTCAAAAAGCCCGC      | SIT3 term-R          |

**SI TABLE 1** Primers used in vector constructions and RT-PCR (cont'd)

| <b>RT-PCR Primers</b> |                        |                      |
|-----------------------|------------------------|----------------------|
| <b>Primers</b>        | <b>Sequence</b>        | <b>Description</b>   |
| RT-19                 | CTCTACATGAGCATGCCCTG   | <b>RNAi</b>          |
| RT-20                 | GAAGGATGTTGAAGGGAGTGAG |                      |
| RT-25                 | AGGTCACCAACGTCAACG     | <b>Antisense RNA</b> |
| RT-26                 | TCGTCAGTTGCTCTCTATGTTG |                      |
| RT-30                 | CATGGGTCTCTCTTATCGTCTG | <b>RT qPCR</b>       |
| RT-31                 | TCTTGTAAGTCAATGGGTGGC  |                      |
| RT-32                 | TGTAAAGATCAGGGTCAACGG  |                      |

**TABLE S2** Gateway vectors used to construct eGFP-tagged SITs

| <b>Fragments</b>                | <b>PCR primers</b> | <b>Donor vectors used</b> | <b>Entry vector created by BP reaction</b> | <b>pDestination vector used</b> | <b>pExpression vector created by LR reaction</b> |
|---------------------------------|--------------------|---------------------------|--------------------------------------------|---------------------------------|--------------------------------------------------|
| SIT1 promoter and coding region | GW-104/GW-157      | pDONR-attP1-attP4         | pMHL_241                                   |                                 |                                                  |
| eGFP                            | GW-56/GW-57        | pDONR-attP4r-attP3r       | pMHL_139                                   |                                 |                                                  |
| SIT1 terminator                 | GW-106/GW-107      | pDONR-attP3-attP2         | pMHL_207                                   |                                 |                                                  |
|                                 |                    |                           |                                            | pMHL_71                         | <b>pMHL_243</b>                                  |
|                                 |                    |                           |                                            |                                 |                                                  |
| SIT2 promoter and coding region | GW-182/GW-183      | pDONR-attP1-attP4         | pMHL_288                                   |                                 |                                                  |
| eGFP                            | GW-56/GW-57        | pDONR-attP4r-attP3r       | pMHL_139                                   |                                 |                                                  |
| SIT2 terminator                 | GW-184/GW-185      | pDONR-attP3-attP2         | pMHL_289                                   |                                 |                                                  |
|                                 |                    |                           |                                            | pMHL_71                         | <b>pMHL_290</b>                                  |
|                                 |                    |                           |                                            |                                 |                                                  |
| SIT3 promoter and coding region | GW-186/GW-187      | pDONR-attP1-attP4         | pMHL_291                                   |                                 |                                                  |
| eGFP                            | GW-56/GW-57        | pDONR-attP4r-attP3r       | pMHL_139                                   |                                 |                                                  |
| SIT3 terminator                 | GW-188/GW-189      | pDONR-attP3-attP2         | pMHL_292                                   |                                 |                                                  |
|                                 |                    |                           |                                            | pMHL_71                         | <b>pMHL_293</b>                                  |

**SI TABLE 3** Signal peptide prediction for SIT1-3

|      | <b>Hectar</b> <sup>1</sup>     | <b>Predotar</b> <sup>2</sup> | <b>pTARGET</b> <sup>3</sup> | <b>Wolf PSORT</b> <sup>4</sup> |
|------|--------------------------------|------------------------------|-----------------------------|--------------------------------|
| SIT1 | Signal peptide (0.5995)        | -                            | Plasma membrane (87.6 %)    | plas: 10                       |
| SIT2 | Signal peptide (0.5999)        | -                            | Plasma membrane (81.4 %)    | plas: 10                       |
| SIT3 | Type II signal anchor (0.4954) | Endoplasmic reticulum (0.95) | Peroxisomes (81.4 %)        | plas: 7                        |

1 <http://www.sb-roscoff.fr/hectar/>

2 <http://urgi.versailles.inra.fr/predotar/predotar.html>

3 <http://golgi.unmc.edu/ptarget/>

4 [http://www.genscript.com/psort/wolf\\_psort.html](http://www.genscript.com/psort/wolf_psort.html)
